# Supplementary material for: Membrane-Associated Enteroviruses Undergo Intercellular Transmission as Pools of Sibling Viral Genomes
Source: PubMed Central journal article supplement — Cell Rep. 2019 Oct 15;29(3):714–723.e4. doi: 10.1016/j.celrep.2019.09.014 (PMC6899498; doi:10.1016/j.celrep.2019.09.014), 2019-10-15
Supplement: mmc1.pdf [file mmc1.pdf]

**Cell Reports, Volume 29**

**Supplemental Information**

**Membrane-Associated Enteroviruses  
Undergo Intercellular Transmission  
as Pools of Sibling Viral Genomes**

**Juan-Vicente Bou, Ron Geller, and Rafael Sanjuán**

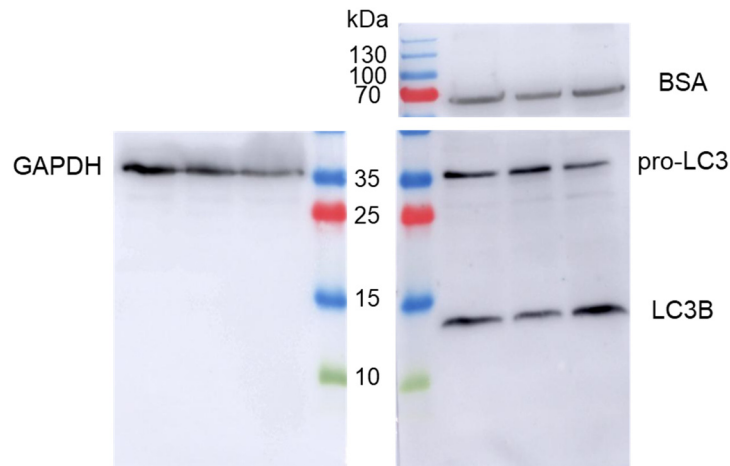

**Figure S1. Western blotting of the P<sub>3</sub> fraction, related to Figure 1.** Cells were inoculated at 10 PFU/cell and the P<sub>3</sub> fraction was prepared from culture media harvested at 12 hpi. GAPDH was used as a positive control for structures containing cytoplasmic content, and should be present in vesicles. In contrast, BSA should not be present inside vesicles or other structures derived from the cytoplasm. In control assays in which we performed the same preparation protocol (P<sub>3</sub> fraction and Western blot) from uninfected cells lysed with ddH<sub>2</sub>O, the BSA band was not present (not shown). This suggests that our P<sub>3</sub> fractions carried over some BSA from the medium. P<sub>3</sub> fractions were positive for LC3B, a typical autophagosome marker. However, the immature form of the protein (pro-LC3) was also detected. Each lane represents a technical replicate. To help visualization and since GAPDH and pro-LC3 proteins are similar in size, the regions of interest of the membrane were cut prior to the primary antibody incubation.

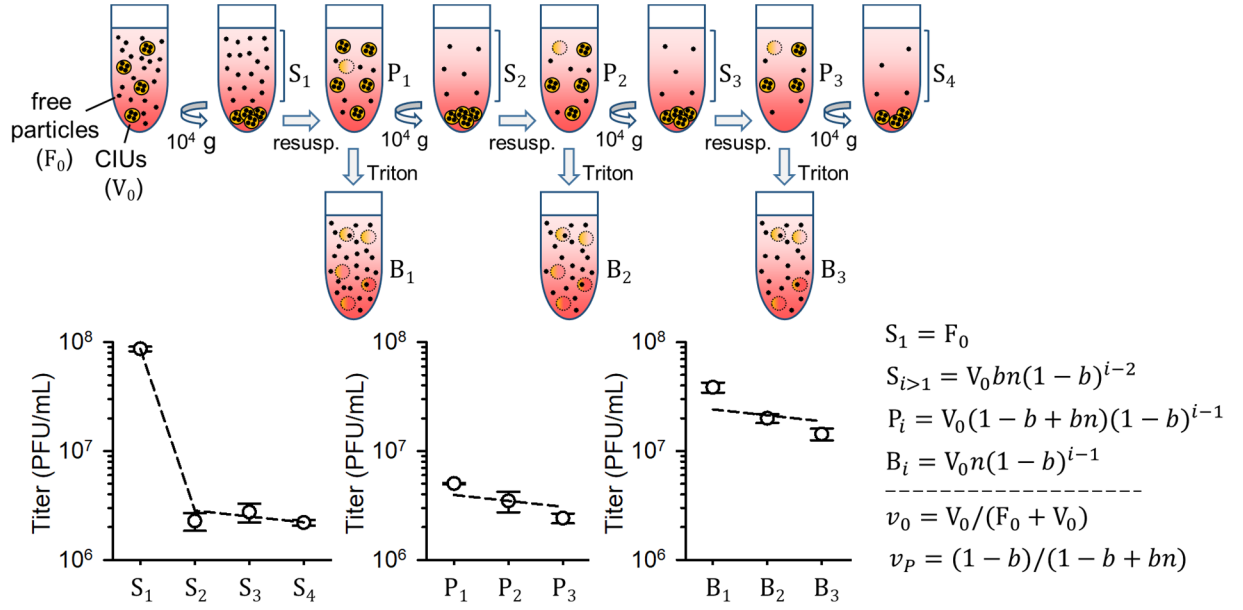

**Figure S2. Model for quantifying contamination of pellet fractions with free viral particles, related to**

**Figures 1 and 2.** The protocol for preparing high-weight infectious units by slow-speed centrifugation is

shown on top. The initial titer (PFU/mL) of free particles is  $F_0$ , whereas the initial titer corresponding to

membrane-associated CIUs is  $V_0$  (each CIU produces 1 PFU). The initial proportion of collective to total

infectious units is thus  $v_0 = V_0 / (F_0 + V_0)$ . The titer of the first supernatant fraction ( $S_1$ ) equals the initial

titer of free particles ( $F_0$ ). The first resuspended pellet fraction ( $P_1$ ) contains  $V_0(1 - b)$  CIUs, where  $b$  is the

probability that CIUs are broken during resuspension. The  $P_1$  fraction also contains  $V_0 b n$  free infectious

particles, where  $n$  is the number of infectious particles released per broken CIU. Hence, the titer of the first

resuspended pellet is  $P_1 = V_0(1 - b + b n)$ . Following detergent treatment, we assume that all CIUs are

disrupted ( $b = 1$ ) and, thus, the titer becomes  $B_1 = V_0 n$ . The second supernatant fraction ( $S_2$ ) contains the

free particles released during resuspension of the first pellet, that is, free particles present in  $P_1$ . Hence,  $S_2 =$

$V_0 b n$ . The expression for the second pellet ( $P_2$ ) is the same as for  $P_1$ , multiplied by the probability of no CIU

breakage during the first resuspension. Hence  $P_2 = V_0(1 - b + b n)(1 - b)$ . The titer of the  $B_2$  fraction is

thus  $B_2 = V_0 n(1 - b)$ . Hence, for the  $i$ -th centrifugation/resuspension round,  $P_i = V_0(1 - b +$

$b n)(1 - b)^{i-1}$ , and  $B_i = V_0 n(1 - b)^{i-1}$ . The  $i$ -th supernatant fraction ( $S_i$ ) contains the free particles released

from CIUs during resuspension of the previous ( $i - 1$ ) pellet, that is, free particles present in  $P_{i-1}$ . Hence,

$S_i = V_0 b n(1 - b)^{i-2}$ . In the graphs below are shown the experimental titers for the first 10 fractions ( $S_1$  to

$S_4$ ,  $P_1$  to  $P_3$ , and  $B_1$  to  $B_3$ ). This was done in three independent experiments. Dashed lines in each graph show

the best fit of the model to data by non-linear least-squares regression. This allowed us to infer the four

parameters of the model:  $V_0$ ,  $F_0$ ,  $b$ , and  $n$ . This inference was done independently for each of the three experimental replicates, allowing us to obtain the mean and error (SEM) of each parameter. In resuspended pellets, the estimated proportion of PFUs corresponding to CIUs is  $v_p = (1 - b)/(1 - b + bn)$ , that is unbroken CIUs divided by total PFUs. The model thus allowed us to estimate the size of CIUs ( $n$ ) and to quantify contamination of pellet fractions with free viral particles resulting from CIU breakage. For simplicity, the model assumed that after centrifugation all free particles remained in the supernatant and all CIUs sedimented. Also, CIU breakage during centrifugation was not considered. Notice, though, that breakage during centrifugation should not lead to contamination of resuspended pellets with free viral particles and, hence, should not be a source of concern for the purpose of this study.

$$Q_0 = e^{-D}$$

|                 |
|-----------------|
| No fluorescence |
|-----------------|

$$Q_1 = De^{-D}$$

|                                                                                   |                                                                                   |                                                                                   |                                                                                   |                                                                                     |
|-----------------------------------------------------------------------------------|-----------------------------------------------------------------------------------|-----------------------------------------------------------------------------------|-----------------------------------------------------------------------------------|-------------------------------------------------------------------------------------|
|  |  |  |  |  |
| $(1 - v_P)g$                                                                      | $(1 - v_P)(1 - g)$                                                                | $v_P g(1 - m)$                                                                    | $v_P(1 - g)(1 - m)$                                                               | $v_P m$                                                                             |
| (1 - v <sub>P</sub> )                                                             |                                                                                   | v <sub>P</sub> (1 - m)                                                            |                                                                                   |                                                                                     |
|                                                                                   |                                                                                   |                                                                                   |                                                                                   | v <sub>P</sub>                                                                      |

$$Q_2 = \frac{1}{2}D^2 e^{-D}$$

|                                                                                    |                                                                                   |                                                                                   |                                                                                   |                                                                                    |                                                                                     |
|------------------------------------------------------------------------------------|-----------------------------------------------------------------------------------|-----------------------------------------------------------------------------------|-----------------------------------------------------------------------------------|------------------------------------------------------------------------------------|-------------------------------------------------------------------------------------|
|                                                                                    |  |  |  |  |  |
|   | $(1 - v_P)^2 g^2$                                                                 | $(1 - v_P)^2 g(1 - g)$                                                            | $\frac{v_P g^2}{(1 - m)(1 - v_P)}$                                                | $\frac{v_P(1 - g)(1 - m)}{(1 - v_P)g}$                                             | $\frac{v_P m(1 - v_P)g}{(1 - v_P)g}$                                                |
|   | $\frac{(1 - v_P)^2}{g(1 - g)}$                                                    | $(1 - v_P)^2(1 - g)^2$                                                            | $\frac{v_P g(1 - m)}{(1 - v_P)(1 - g)}$                                           | $\frac{v_P(1 - m)}{(1 - v_P)(1 - g)^2}$                                            | $\frac{v_P m}{(1 - v_P)(1 - g)}$                                                    |
|   | $\frac{(1 - v_P)g^2}{v_P(1 - m)}$                                                 | $\frac{(1 - v_P)(1 - g)}{v_P g(1 - m)}$                                           | $\frac{v_P^2 g^2(1 - m)^2}{g(1 - g)}$                                             | $\frac{v_P^2(1 - m)^2}{g(1 - g)}$                                                  | $\frac{v_P^2 gm(1 - m)}{g(1 - g)}$                                                  |
|   | $\frac{(1 - v_P)g}{v_P(1 - g)(1 - m)}$                                            | $\frac{(1 - v_P)(1 - g)^2}{v_P(1 - m)}$                                           | $\frac{v_P^2(1 - m)^2}{g(1 - g)}$                                                 | $\frac{v_P^2(1 - g)^2}{(1 - m)^2}$                                                 | $\frac{v_P^2(1 - g)}{m(1 - m)}$                                                     |
|  | $(1 - v_P)g v_P m$                                                                | $\frac{(1 - v_P)(1 - g)}{v_P m}$                                                  | $\frac{v_P^2 gm(1 - m)}{m(1 - m)}$                                                | $\frac{v_P^2(1 - g)}{m(1 - m)}$                                                    | $\frac{v_P^2 m^2}{m(1 - m)}$                                                        |

**Figure S3. Estimation of the proportion of polymorphic CIUs in the presence of contaminant free viral particles, related to Figure 2.** The  $P_3$  fraction was used for infecting cells at ca.  $D = 0.1$  PFU/cell. Flow cytometry was used for counting non-fluorescent, GFP-positive, mCherry-positive, and doubly fluorescent cells at 7 hpi. The proportion of cells receiving zero ( $Q_0$ ), one ( $Q_1$ ), or two ( $Q_2$ ) PFUs (CIUs or free particles) was assumed to follow a Poisson distribution. Cells receiving more PFUs were neglected. Based on this, the actual  $D$  was calculated from the observed proportion of non-fluorescent cells,  $Q_0 = e^{-D}$ . This allowed us to infer  $Q_1$  and  $Q_2$ . The probability of receiving a CVB3-EGFP free particle, a CVB3-mCherry free particle, a CVB3-EGFP CIU, a CVB3-mCherry CIU, or a polymorphic CIU containing both virus variants among cells receiving one PFU is shown in the first table. Grid colors indicate the corresponding phenotype of the cell (green: GFP positive; red: mCherry positive; orange: doubly fluorescent). For cells receiving two PFUs, the probability of each possible combination is shown in the second table. These probabilities depend on the proportion of CVB3-GFP to total virus ( $g$ ), the proportion of collective to total infectious units in the inoculum ( $v_P$ ), and the proportion of polymorphic to total CIUs ( $m$ ). Parameter  $g$  was directly estimated as the ratio of green to (green + red) fluorescent cells ( $g = 0.464$ ), whereas  $v_P$  was determined as detailed in Fig. S2 ( $v_P = 0.284$ ). Parameter  $m$  was numerically calculated from the indicated values of  $g$  and  $v_P$  and the observed proportions of EGFP-positive, mCherry-positive, and doubly fluorescent cells.

**Table S1.** Flow cytometry counts of cultures inoculated with P<sub>3</sub> fractions harvested from cells coinfecting with CVB3-EGFP and CVB-mCherry at 12 hpi, related to Figure 2.

| Category               | Observed count (%) |             |             |             | Expected count <sup>c</sup> (%) |
|------------------------|--------------------|-------------|-------------|-------------|---------------------------------|
|                        | N                  | G           | R           | D           | E(D)                            |
| EGFP                   | –                  | +           | –           | +           | +                               |
| mCherry                | –                  | –           | +           | +           | +                               |
| Assay 1                | 90,598 (91.2%)     | 3507 (3.5%) | 4192 (4.2%) | 1081 (1.1%) | 243 (0.24%)                     |
| Assay 2                | 90,104 (90.8%)     | 3648 (3.7%) | 4205 (4.2%) | 1268 (1.3%) | 271 (0.27%)                     |
| Assay 3                | 90,241 (91.0%)     | 3678 (3.7%) | 4092 (4.1%) | 1144 (1.2%) | 255 (0.26%)                     |
| Average <sup>a,b</sup> | 90314 (91.0%)      | 3611 (3.6%) | 4163 (4.2%) | 1164 (1.2%) | 256 (0.25%)                     |

<sup>a</sup>On average  $9.0 \pm 0.1$  % of the cells were fluorescent, calculated as  $(G+R+D)/(N+G+R+D)$ .

<sup>b</sup>On average, among fluorescent cells,  $13.0 \pm 0.5$  % were doubly fluorescent, calculated as  $D/(G+R+D)$ .

<sup>c</sup>Calculated as  $E(D)=(G+D) \times (R+D)/(N+G+R+D)$ . The average observed count was 4.5-fold higher than the expected count.

**Table S2.** Flow cytometry counts of cultures inoculated with P<sub>3</sub> fractions harvested from cells coinfecting with CVB3-EGFP and CVB-mCherry at 8 hpi, related to Figure 2.

| Category               | Observed count (%) |             |             |             | Expected count <sup>c</sup> (%) |
|------------------------|--------------------|-------------|-------------|-------------|---------------------------------|
|                        | N                  | G           | R           | D           | E(D)                            |
| EGFP                   | –                  | +           | –           | +           | +                               |
| mCherry                | –                  | –           | +           | +           | +                               |
| Assay 1                | 90,950 (91.0%)     | 3574 (3.6%) | 3567 (3.6%) | 1909 (1.9%) | 300 (0.3%)                      |
| Assay 2                | 90,518 (90.5%)     | 3648 (3.6%) | 3455 (3.5%) | 2379 (2.4%) | 352 (0.4%)                      |
| Assay 3                | 90,131 (90.1%)     | 4430 (4.4%) | 3516 (3.5%) | 1923 (1.9%) | 346 (0.3%)                      |
| Average <sup>a,b</sup> | 90,533 (90.5%)     | 3884 (3.9%) | 3512 (3.5%) | 2070 (2.1%) | 332 (0.3%)                      |

<sup>a</sup>On average  $9.5 \pm 0.2$  % of the cells were fluorescent, calculated as  $(G+R+D)/(N+G+R+D)$ .

<sup>b</sup>On average, among fluorescent cells,  $21.9 \pm 1.7$  % were doubly fluorescent, calculated as  $D/(G+R+D)$ .

<sup>c</sup>Calculated as  $E(D)=(G+D) \times (R+D)/(N+G+R+D)$ . The average observed count was 6.2-fold higher than the expected count.

**Table S3.** Flow cytometry counts of cultures inoculated with P<sub>2</sub>\* fractions harvested from cells coinfecting with CVB3-EGFP and CVB-mCherry at 12 hpi, related to Figure 2.

| Category               | Observed count (%) |             |             |             | Expected count <sup>c</sup> (%) |
|------------------------|--------------------|-------------|-------------|-------------|---------------------------------|
|                        | N                  | G           | R           | D           | E(D)                            |
| EGFP                   | –                  | +           | –           | +           | +                               |
| mCherry                | –                  | –           | +           | +           | +                               |
| Assay 1                | 87,414 (86.5%)     | 7574 (7.5%) | 2375 (2.4%) | 3670 (3.6%) | 673 (0.7%)                      |
| Assay 2                | 84,248 (83.2%)     | 9365 (9.2%) | 2970 (2.9%) | 4736 (4.7%) | 1072 (1.1%)                     |
| Assay 3                | 86,828 (85.6%)     | 8017 (7.9%) | 2672 (2.6%) | 3920 (3.9%) | 776 (0.8%)                      |
| Average <sup>a,b</sup> | 86,163 (90.5%)     | 8319 (3.9%) | 2672 (3.5%) | 4109 (2.1%) | 840 (0.8%)                      |

<sup>a</sup>On average  $14.9 \pm 1.0$  % of the cells were fluorescent, calculated as  $(G+R+D)/(N+G+R+D)$ .

<sup>b</sup>On average, among fluorescent cells,  $27.2 \pm 0.3$  % were doubly fluorescent, calculated as  $D/(G+R+D)$ .

<sup>c</sup>Calculated as  $E(D)=(G+D) \times (R+D)/(N+G+R+D)$ . The average observed count was 5.0-fold higher than the expected count.
